# Supplementary material for: Utilization of single biomass-derived micro-mesoporous carbon for dual-carbon symmetric and hybrid sodium-ion capacitors
Source: Royal Society of Chemistry journal article supplement (doi:10.1039/d3nj01349a), 2023-01-01
Supplement: d3nj01349a1.pdf [file d3nj01349a1.pdf]

## **Supporting Information**

### **Utilization of Single Biomass-derived Micro-Mesoporous Carbon for Dual-Carbon Symmetric and Hybrid Sodium-ion Capacitors**

**Authors:** Nagmani <sup>a</sup>, Biraj Kanta Satpathy <sup>b</sup>, Abhijeet Kumar Singh <sup>a</sup>, Debabrata Pradhan <sup>b,c</sup> and Sreeraj Puravankara <sup>a\*</sup>

**Affiliations:** <sup>a</sup> School of Energy Science & Engineering, Indian Institute of Technology Kharagpur, Kharagpur -721302, West Bengal, India

<sup>b</sup> School of Nanoscience and Technology, Indian Institute of Technology Kharagpur, Kharagpur -721302, West Bengal, India

<sup>c</sup> Materials Science Centre, Indian Institute of Technology Kharagpur, Kharagpur -721302, West Bengal, India

**Corresponding author:**      **Dr. Sreeraj Puravankara**

School of Energy Science & Engineering, IIT Kharagpur,

Kharagpur -721302, West Bengal, India

Phone (Office) - +913222 260801

email: sreeraj@iitkgp.ac.in

#### **ORCID ID**

Nagmani: <https://orcid.org/0000-0003-4618-4952>

Biraj Kanta Satpathy: <https://orcid.org/0000-0002-7639-024X>

Abhijeet Kumar Singh: <https://orcid.org/0009-0008-3383-5107>

Sreeraj Puravankara: <https://orcid.org/0000-0002-9238-0148>

Debabrata Pradhan: <https://orcid.org/0000-0003-3968-9610>

**Figures:**

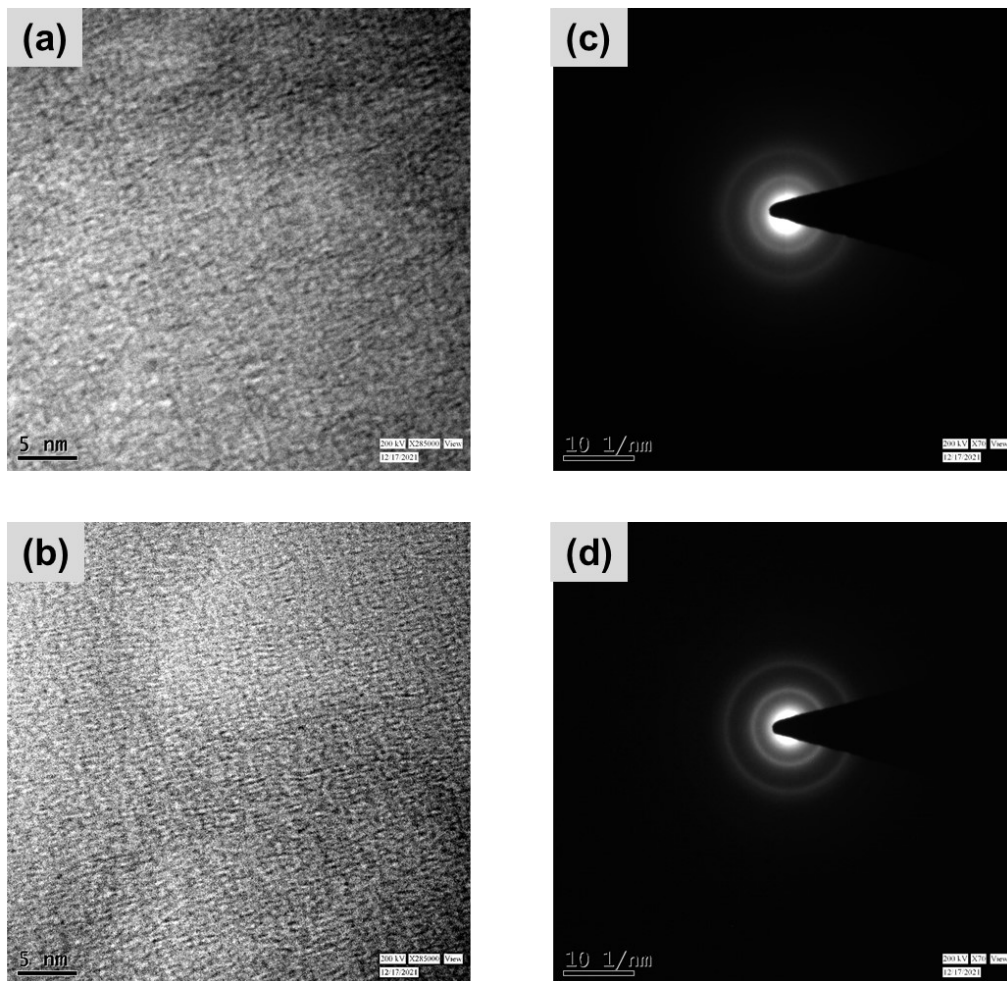

**Figure S1:** HR-TEM image showing the turbostratic curve (a) AJPC-M (b) AJPC-D.

SAED pattern showing the diffuse ring (c) AJPC-M, (d) AJPC-D.

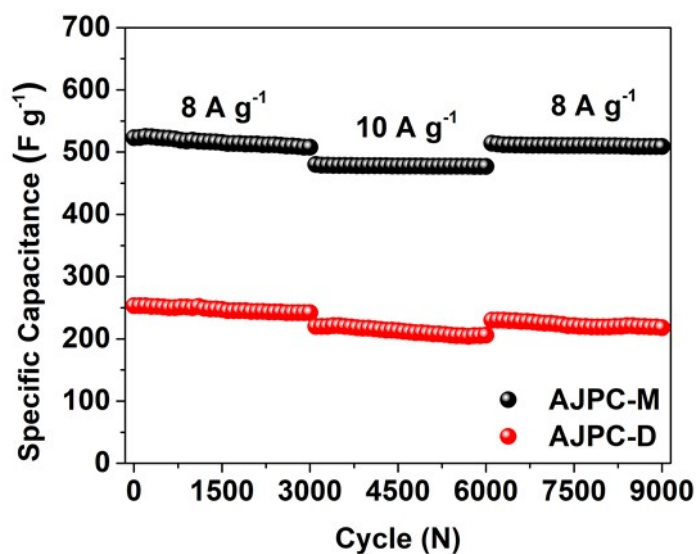

**Figure S2:** Long cyclic performance of AJPC-D and AJPC-M at the current density of  $8 \text{ A g}^{-1}$  and  $10 \text{ A g}^{-1}$ .

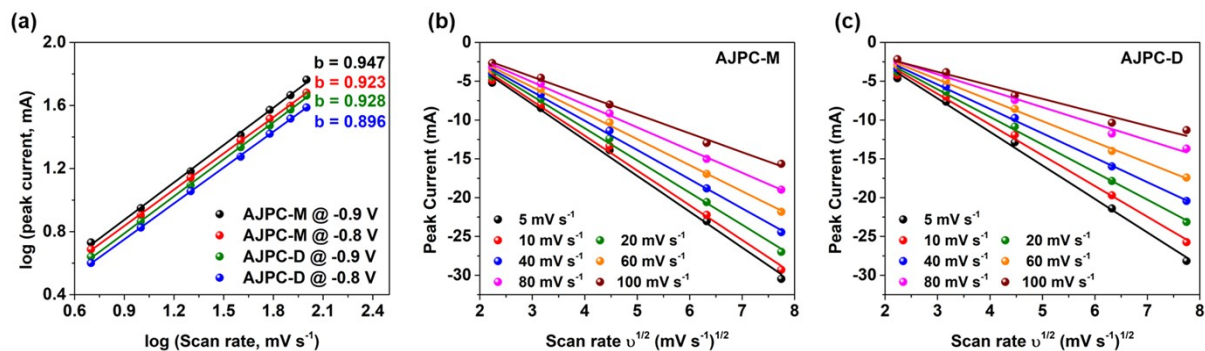

**Figure S3:** (a) Logarithmic plot for peak current vs. scan rate [ $\log(i)$  and  $\log(v)$ ]. Plots for peak current and the square root of scan rate to calculate ions diffusion coefficient using Randles Sevcik equation in (b) AJPC-M, and (c) AJPC-D.

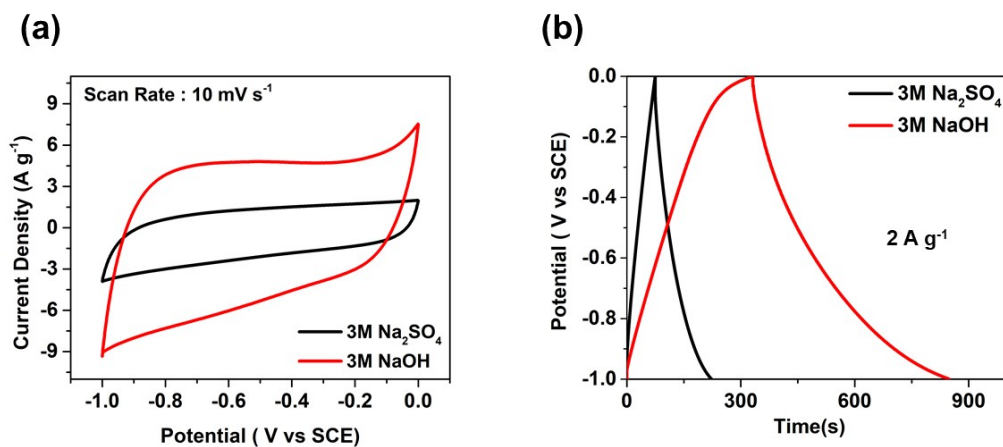

**Figure S4:** (a) CV curve (b) GCD curve at the current density of 2 A g<sup>-1</sup> of AJPC-M using 3M NaOH (basic medium) and 3M Na<sub>2</sub>SO<sub>4</sub> (neutral medium).

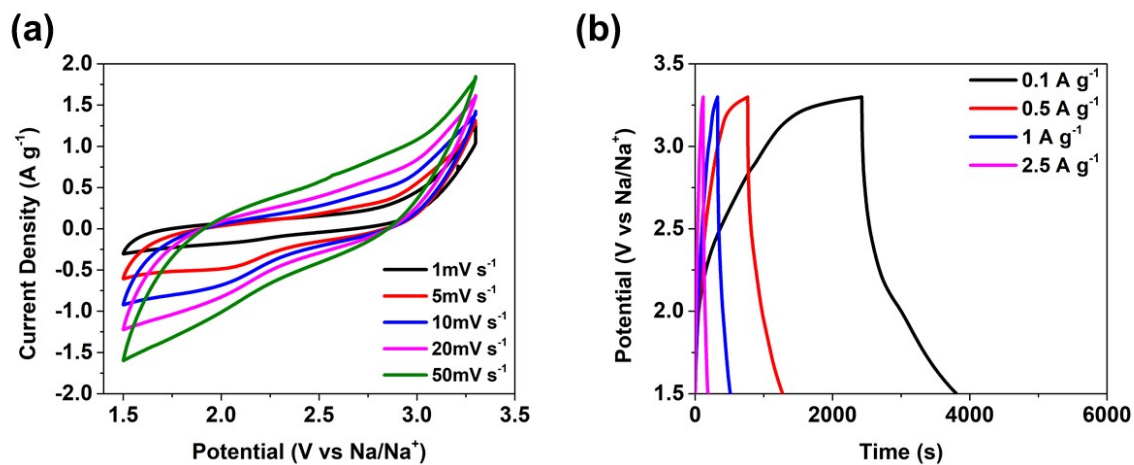

**Figure S5:** (a) CV curve at different scan rates for AJPC-M, (b) GCD profile for AJPC-D at different current densities.

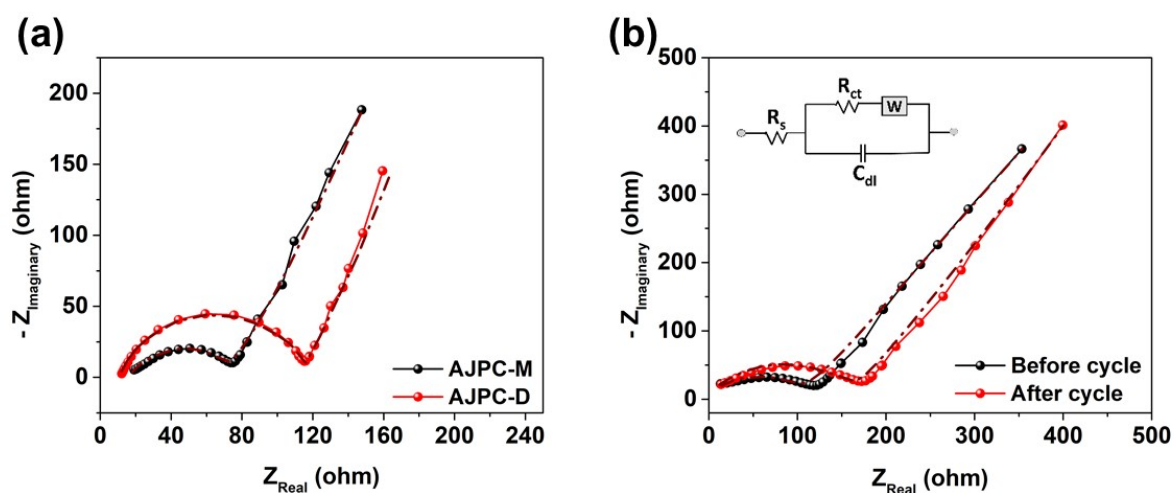

**Figure S6:** EIS spectra of AJPC-M and AJPC-D as cathode before cycling. (b) EIS spectra of SSIC (AJPC-M // AJPC-M) before and after the first cycle (inset: equivalent circuit).

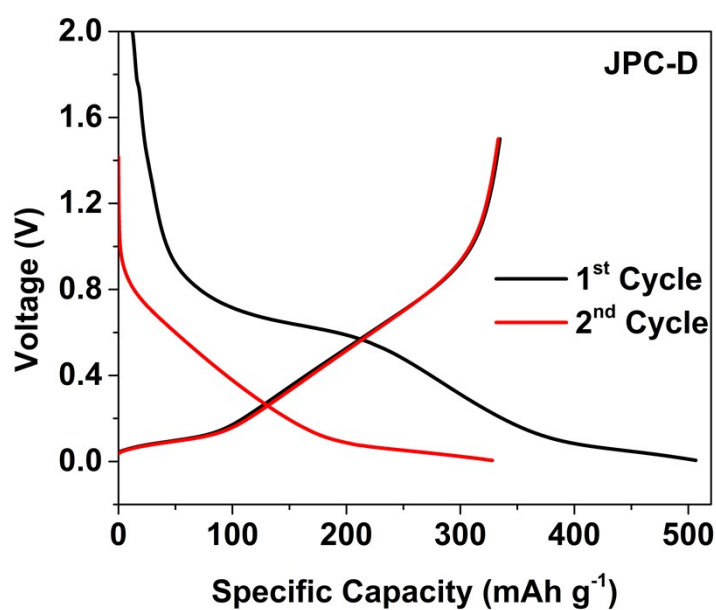

**Figure S7:** The GCD profile of hard carbon derived from jute via direct pyrolysis at a current density of  $30 \text{ mA g}^{-1}$ . (Reprinted (adapted) with permission.<sup>1</sup> Copyright 2022, American Chemical Society).

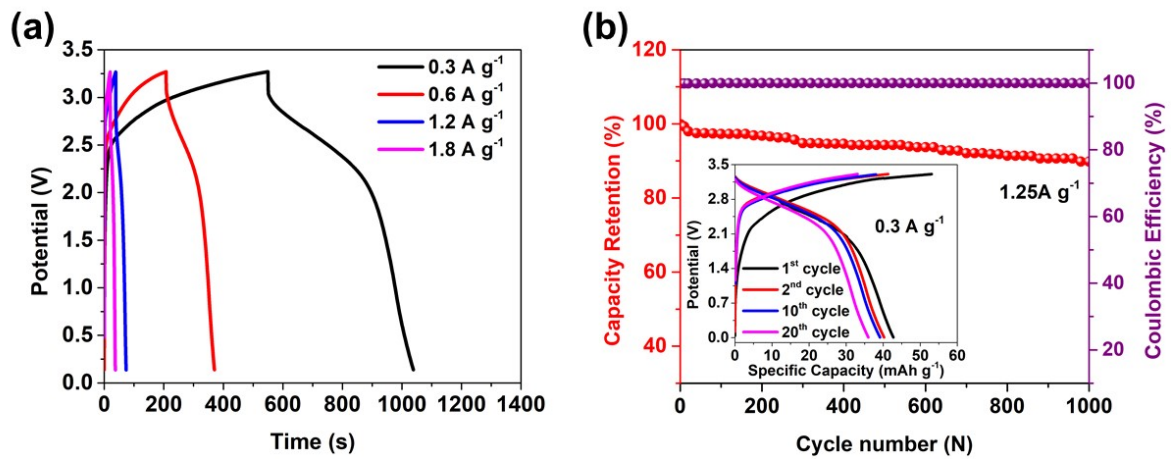

**Figure S8:** (a) The GCD profile of ASICs at different current densities, (b) long cyclic stability of ASICs at the current density of 1.25 A g<sup>-1</sup> (inset: charge discharge profile at 0.3 A g<sup>-1</sup>)

## **Tables:**

**Table S1:** Resistance values obtained from fitted EIS spectra of AJPC-electrode.

| <b>Electrode</b> | <b>R<sub>S</sub> (Ω)</b> | <b>R<sub>CT</sub> (Ω)</b> | <b>R<sub>Total</sub> (Ω)</b> |
|------------------|--------------------------|---------------------------|------------------------------|
| AJPC-D (Non-Aq)  | 1.43                     | 0.65                      | 2.08                         |
| AJPC-M (Non-Aq)  | 1.37                     | 0.22                      | 1.59                         |
| AJPC-D (Aq)      | 13                       | 93                        | 106                          |
| AJPC-M (Aq)      | 16                       | 55                        | 71                           |

**Table S2:** A summary of SSICs device based on the biomass-derived carbon-based anode and cathode materials in an aqueous electrolyte system.

| Material           | ED          | PD          | Reference        |
|--------------------|-------------|-------------|------------------|
| Jute carbon        | 15.44       | 402.78      | 2                |
| Jute sticks        | 20          | 500         | 3                |
| Recycled jute      | 21          | 1820        | 4                |
| Pomegranate        | 8.8         | 3950        | 5                |
| Rice straw         | 9.31        | 500         | 6                |
| Plastic (LDPE)     | 9.81        | 450         | 7                |
| Algae microspheres | 20          | 332         | 8                |
| Cashew nut         | 11.2        | 400         | 9                |
| <b>AJPC-M</b>      | <b>37.7</b> | <b>785</b>  | <b>This Work</b> |
|                    | <b>9.75</b> | <b>7895</b> |                  |

**Table S3:** A summary of SICs device based on carbon-based anode and cathode materials in a non-aqueous electrolyte system.

| <b>Anode//cathode</b>                    | <b>Carbon's Precursor</b> | <b>Maximum ED @ PD</b> | <b>Maximum PD @ ED</b> | <b>References</b> |
|------------------------------------------|---------------------------|------------------------|------------------------|-------------------|
| Polyimide– Graphene//rGO                 | Polymide                  | 55.5 @395              | 3400 @22.5             | 10                |
| Hard carbon(coconut shell)//AC           | Coconut shell             | 82@200                 | 9000@20                | 11                |
| Porous carbon//AC                        | Sucrose (STC-16)          | 61 @100                | 24000@12               | 12                |
| C-CNT@Carbon Nanofiber//AC               | Bacterial cellulose       | 59.1 @275              | 5500@38                | 13                |
| PIGC//NBEG                               | Polyimide/graphene oxide  | 81@600                 | 9500@55                | 14                |
| Carbon sphere(CS)//AC( CS)               | Fruit Juice               | 52.2@300               | 3000@18                | 15                |
| S-NCNF//AC                               | Polyacrylonitrile         | 95@184                 | 17000@24               | 16                |
| EEG//AC                                  | Commercial                | 90@2000                | 17500@17               | 17                |
| Hard carbon //AC                         | Olive pit                 | 100@345                | 9000@35                | 18                |
| Brown- TiO <sub>2</sub> //AC             | Commercial                | 68@625                 | 7500@23                | 19                |
| CNF// CNF                                | Lignin/PAN                | 68@172                 | 2000@40                | 20                |
| V <sub>2</sub> O <sub>3</sub> @MCNF//A C | Commercial                | 96@250                 | 7680@76.8              | 21                |



## References:

- (1) Nagmani, Verma, P.; Puravankara, S. Jute-Fiber Precursor-Derived Low-Cost Sustainable Hard Carbon with Varying Micro/Mesoporosity and Distinct Storage Mechanisms for Sodium-Ion and Potassium-Ion Batteries. *Langmuir* **2022**, *38* (49). <https://doi.org/10.1021/acs.langmuir.2c02575>.
- (2) Manasa, P.; Lei, Z. J.; Ran, F. Biomass Waste Derived Low Cost Activated Carbon from *Carchorus Olitorius* (Jute Fiber) as Sustainable and Novel Electrode Material. *Journal of Energy Storage*. **2020**, 101494. <https://doi.org/10.1016/j.est.2020.101494>.
- (3) Shah, S. S.; Cevik, E.; Aziz, M. A.; Qahtan, T. F.; Bozkurt, A.; Yamani, Z. H. Jute Sticks Derived and Commercially Available Activated Carbons for Symmetric Supercapacitors with Bio-Electrolyte: A Comparative Study. *Synthetic Metals*. **2021**, 116765. <https://doi.org/10.1016/j.synthmet.2021.116765>.
- (4) Zequine, C.; Ranaweera, C. K.; Wang, Z.; Dvornic, P. R.; Kahol, P. K.; Singh, S.; Tripathi, P.; Srivastava, O. N.; Singh, S.; Gupta, B. K.; Gupta, G.; Gupta, R. K. High-Performance Flexible Supercapacitors Obtained via Recycled Jute: Bio-Waste to Energy Storage Approach. *Sci. Rep.* **2017**, *7* (1), 1–12. <https://doi.org/10.1038/s41598-017-01319-w>.
- (5) Choi, J.; Wixson, T.; Worsley, A.; Dhungana, S.; Mishra, S. R.; Perez, F.; Gupta, R. K. Pomegranate: An Eco-Friendly Source for Energy Storage Devices. *Surface and Coatings Technology*. **2021**, 127405. <https://doi.org/10.1016/j.surfcoat.2021.127405>.
- (6) Liu, S.; Zhao, Y.; Zhang, B.; Xia, H.; Zhou, J.; Xie, W.; Li, H. Nano-Micro Carbon Spheres Anchored on Porous Carbon Derived from Dual-Biomass as High Rate Performance Supercapacitor Electrodes. *Journal of Power Sources*. **2018**, pp 116–126. <https://doi.org/10.1016/j.jpowsour.2018.02.014>.
- (7) Zhang, H.; Zhou, X. L.; Shao, L. M.; Lü, F.; He, P. J. Hierarchical Porous Carbon Spheres from Low-Density Polyethylene for High-Performance Supercapacitors. *ACS Sustain. Chem. Eng.* **2019**, *7* (4), 3801–3810. <https://doi.org/10.1021/acssuschemeng.8b04539>.
- (8) Zhu, B.; Liu, B.; Qu, C.; Zhang, H.; Guo, W.; Liang, Z.; Chen, F.; Zou, R. Tailoring Biomass-Derived Carbon for High-Performance Supercapacitors from Controllably

- Cultivated Algae Microspheres. *J. Mater. Chem. A* **2018**, *6* (4), 1523–1530.  
<https://doi.org/10.1039/c7ta09608a>.
- (9) Cai, N.; Cheng, H.; Jin, H.; Liu, H.; Zhang, P.; Wang, M. Porous Carbon Derived from Cashew Nut Husk Biomass Waste for High-Performance Supercapacitors. *Journal of Electroanalytical Chemistry*. **2020**, 113933.  
<https://doi.org/10.1016/j.jelechem.2020.113933>.
- (10) Zhao, Q.; Yang, D.; Zhang, C.; Liu, X. H.; Fan, X.; Whittaker, A. K.; Zhao, X. S. Tailored Polyimide-Graphene Nanocomposite as Negative Electrode and Reduced Graphene Oxide as Positive Electrode for Flexible Hybrid Sodium-Ion Capacitors. *ACS Appl. Mater. Interfaces* **2018**, *10* (50), 43730–43739.  
<https://doi.org/10.1021/acsami.8b17171>.
- (11) Jayaraman, S.; Jain, A.; Ulaganathan, M.; Edison, E.; Srinivasan, M. P.; Balasubramanian, R.; Aravindan, V.; Madhavi, S. Li-Ion vs. Na-Ion Capacitors: A Performance Evaluation with Coconut Shell Derived Mesoporous Carbon and Natural Plant Based Hard Carbon. *Chemical Engineering Journal*. **2017**, pp 506–513.  
<https://doi.org/10.1016/j.cej.2017.01.108>.
- (12) Runyu, Yan.; Karen, L.; Jan, P. H.; Markus, A.; Martin, O.; Porous Nitrogen-Doped Carbon/ Carbon Nanocomposite Electrodes Enable Sodium Ion Capacitors with High Capacity and Rate Capability, *Nano Energy*, **2020**, *67*, 104240.  
<https://doi.org/10.1016/j.nanoen.2019.104240>.
- (13) Xu, J.; Liu, Z.; Zhang, F.; Tao, J.; Shen, L.; Zhang, X. Bacterial Cellulose-Derived Carbon Nanofibers as Both Anode and Cathode for Hybrid Sodium Ion Capacitor. *RSC Adv.* **2020**, *10* (13), 7780–7790. <https://doi.org/10.1039/c9ra10225f>.
- (14) Zhang, H.; Hu, M.; Huang, Z. H.; Kang, F.; Lv, R. Sodium-Ion Capacitors with Superior Energy-Power Performance by Using Carbon-Based Materials in Both Electrodes. *Progress in Natural Science: Materials International*. **2020**, pp 13–19.  
<https://doi.org/10.1016/j.pnsc.2020.01.009>.
- (15) Wang, S.; Wang, R.; Zhang, Y.; Jin, D.; Zhang, L. Scalable and Sustainable Synthesis of Carbon Microspheres via a Purification-Free Strategy for Sodium-Ion Capacitors. *Journal of Power Sources*. **2018**, pp 33–40.  
<https://doi.org/10.1016/j.jpowsour.2018.01.019>.

- (16) Yu, Q.; Dong, T.; Qiu, R.; Wang, H. Sulfur and Nitrogen Dual-Doped Carbon Nanofiber with Enlarged Interlayer Distance as a Superior Anode Material for Sodium-Ion Capacitors. *Materials Research Bulletin*. **2021**, 111211. <https://doi.org/10.1016/j.materresbull.2021.111211>.
- (17) Huang, T.; Liu, Z.; Yu, F.; Wang, F.; Li, D.; Fu, L.; Chen, Y.; Wang, H.; Xie, Q.; Yao, S.; Wu, Y. Boosting Capacitive Sodium-Ion Storage in Electrochemically Exfoliated Graphite for Sodium-Ion Capacitors. *ACS Appl. Mater. Interfaces* **2020**, 12 (47), 52635–52642. <https://doi.org/10.1021/acsami.0c14611>.
- (18) Ajuria, J.; Redondo, E.; Arnaiz, M.; Mysyk, R.; Rojo, T.; Goikolea, E. Lithium and Sodium Ion Capacitors with High Energy and Power Densities Based on Carbons from Recycled Olive Pits. *Journal of Power Sources*. **2017**, pp 17–26. <https://doi.org/10.1016/j.jpowsour.2017.04.107>.
- (19) Babu, B.; Ullattil, S. G.; Prasannachandran, R.; Kavil, J.; Periyat, P.; Shaijumon, M. M. Ti<sup>3+</sup> Induced Brown TiO<sub>2</sub> Nanotubes for High Performance Sodium-Ion Hybrid Capacitors. *ACS Sustain. Chem. Eng.* **2018**, 6 (4), 5401–5412. <https://doi.org/10.1021/acssuschemeng.8b00236>.
- (20) Zhao, N.; Wang, C.; Li, B.; Shen, W.; Kang, F.; Huang, Z. H. Construction of Flexible Lignin/Polyacrylonitrile-Based Carbon Nanofibers for Dual-Carbon Sodium-Ion Capacitors. *J. Mater. Sci.* **2022**, 57 (25), 11809–11823. <https://doi.org/10.1007/s10853-022-07371-w>.
- (21) Jun, Y.; Xiang, H.; Junwei, L.; Yangjie, L.; Guobao, Z.; Taixing, H. V<sub>2</sub>O<sub>3</sub> Nanoparticles Confined in High-Conductivity and High-Throughput Carbon Nanofiber Nanohybrids for Advanced Sodium-Ion Capacitors. *ACS Appl. Mater. Interfaces* **2021**, 13, 10001-10012. <https://doi.org/10.1021/acsami.0c21313>.
